# Supplementary material
Source: PubMed Central journal article supplement (PMC2840307)
Supplement: 0914865107_pnas.200914865SI.pdf [file 0914865107_pnas.200914865SI.pdf]

# Supporting Information

Rucci et al. 10.1073/pnas.0914865107

## SI Materials and Methods

**Immunophenotypic Analysis.** Immunophenotypic analysis of T and B cell populations was performed using the following anti-mouse antibodies: APC-conjugated anti-CD4, biotin-conjugated anti-CD8, biotin-conjugated anti-CD4, PerCP-conjugated anti-CD4, FITC-conjugated anti-CD3, biotin-conjugated anti-B220, biotin-conjugated anti-CD11b, biotin-conjugated anti-Gr1, FITC-conjugated anti-CD44, PE-conjugated anti-CD25, PE-conjugated anti-CD62L, FITC- and APC-conjugated anti-B220, FITC-conjugated anti-CD43, and PerCp- and APC-conjugated anti-IgM (all from BD Biosciences); PE-conjugated anti-CD8, Alexa700-conjugated anti-B220, Pacific Blue-conjugated anti-IgD, PE-conjugated anti-AA4.1, PE-Cy7-conjugated anti-CD23, PE-Cy5-conjugated anti-IgM, APC-conjugated anti-GL7, and the APC anti-mouse Foxp3 staining set (all from eBioscience); and APC-conjugated anti-CD24 (clone M1/69) and FITC-conjugated anti-IgG1 (Biolegend). Samples stained with biotin-conjugated antibodies underwent an additional incubation with PerCp-conjugated streptavidin (BD Pharmingen). B220<sup>+</sup> B cell subpopulations in the spleen were defined as follows:

Transitional (Tr1-Tr2) B cells: AA4.1<sup>+</sup> B220<sup>+</sup> IgM<sup>hi</sup> CD21<sup>lo</sup>  
Follicular B cells: AA4.1<sup>-</sup> B220<sup>+</sup> CD21<sup>int</sup> IgD<sup>+</sup> CD23<sup>+</sup>  
Marginal zone B cells: AA4.1<sup>-</sup> B220<sup>+</sup> CD21<sup>hi</sup> CD23<sup>-</sup> IgM<sup>hi</sup>  
IgG1-producing cells: B220<sup>hi</sup> + icIgG1<sup>+</sup>.

**Histopathology.** Histopathology of the thymus was performed on five 4- to 6-week-old mice, whereas search for lymphoid infiltrates in the liver and the gut was performed on five 8-week-old mice. Four-micrometer-thick sections from formalin-fixed, paraffin-embedded tissues were taken on a microtome and subjected to routine hematoxylin/eosin staining. For immunohistochemistry, sections were dewaxed and rehydrated through serial passages in xylene and alcohol and endogenous peroxidase activity was blocked with 0.3% H<sub>2</sub>O<sub>2</sub> in methanol. Epitope retrieval was achieved by microwave treatment in PBS buffer containing 1.0 mM EDTA buffer, pH 8.0. Sections were then washed and incubated for 20 min in 5% normal human serum before incubation for 2 h with the primary antibody (rat polyclonal anti-mouse CD3, DAKO Cytomation), followed by 30 min incubation in buffer containing the appropriate secondary antibody (biotinylated rabbit anti-rat, 1:100, Vector). Immunolabeling was then revealed by incubation with streptavidin-horseradish peroxidase (HRP) and diaminobenzidine (DAB) (DAKO Cytomation) and slides were counterstained with hematoxylin. Images were acquired with an Olympus DP70 digital camera mounted on an Olympus Bx60 microscope, using Cell<sup>F</sup> imaging software (Soft Imaging System).

**Analysis of T and B Cell Repertoire.** For analysis of T cell repertoire, cDNA was prepared by reverse transcriptase using RNA from thymocytes and from T cell-enriched splenocytes, positively selected using anti-CD90 mAb-coated magnetic beads (Miltenyi Biotec). Immunoscope analysis of TCR V $\beta$  repertoire was performed as described (1). Briefly, 2 ng of cDNA was amplified with each of the 24 TCRV $\beta$  family member-specific primers together with a TCRC $\beta$  primer. Amplification was performed for 40 cycles at 60 °C of annealing temperature and 1 min 30 sec of extension, using TaqGold (Applied Biosystems). Each PCR product (5  $\mu$ L) was then subjected to four runoff reactions using a nested fluo-

rescent primer specific for the TCRC $\beta$  segment. Runoff conditions were as follows: 2 min at 94 °C, 2 min at 60 °C, and 20 min at 72 °C.

For the analysis of B cell repertoire, cDNA was prepared from B cell-enriched splenocytes, obtained following negative selection using anti-CD90-coated magnetic beads (Miltenyi Biotec). The following primers were used to amplify the CDR3 region of Ig heavy chains:

Forward primers:

MIGHV1: 5'-TCCAGCACAGCCTACATGCAGCTC-3'  
MIGHV2: 5'-CAGGTGCAGCTGAAGGAGTCAGG-3'  
MIGHV3: 5'-AGGTGCAGCTTCAGGAGTCAGG-3'  
MIGHV5: 5'-CAGCTGGTGGAGTCTGGGGGA-3'  
MIGHV6: 5'-AAGTGAAGCTTGAGGAGTCTGG-3'  
MIGHV7: 5'-AGGTGAAGCTGGTGGAGTCTGG-3'.

Reverse primer:

MIGH J<sub>H</sub>: 5'-CTTACCTGAGGAGACGGTGA-3'.

Amplification reactions were performed using 2 ng of cDNA in 50  $\mu$ L of reaction containing 1 unit/ $\mu$ L of Taq DNA polymerase modified for hot-start PCR, 200  $\mu$ M dNTPs, 1  $\mu$ M of each primer, and 1.5 mM MgCl<sub>2</sub> in 10 $\times$  amplification buffer (Applied Biosystems). After initial incubation for 10 min at 95 °C, the amplification was carried out for 40 cycles as follows: 30 sec at 94 °C, 30 sec at 60 °C, and 1 min 30 sec at 72 °C, followed by a final step of 10 min at 72 °C. Each PCR product was subjected to 4 runoff cycles primed with the same reverse primer used for the PCR and labeled with 6-carboxyfluorescein (0.2  $\mu$ M) in the presence of 1 unit/ $\mu$ L of Taq DNA polymerase modified for hot-start PCR, 200  $\mu$ M dNTPs, and 1.5 mM MgCl<sub>2</sub> in 10 $\times$  amplification buffer. Runoff cycles were as follows: 2 min at 94 °C, 2 min at 60 °C, and 20 min at 72 °C. PCR products were then processed on an ABI3130 genetic analyzer. Spectratype data were analyzed using GeneMapper v3.7 software.

**Analysis of Cytokine Production.** Splenic T cells were cultured in vitro for 72 h with anti-CD3 plus anti-CD28 mAb as detailed above. At the end of the culture, the supernatants were collected and analyzed using Multiplex Bead Immunoassays for cytokines of interest (IL-2, IL-4, IL-5, IL-6, IL-10, IL-13, IL-17, IFN- $\gamma$ , and TNF- $\alpha$ ), following the manufacturer's instructions (Invitrogen) and using a Luminex IS 100 instrument. Data were analyzed using the Luminex 100 Integrated System 2.3 software and were reported as median fluorescent intensity.

**Measurement of Specific Antibodies.** Low- and high-affinity anti-TNP IgG antibody titers were measured by ELISA 7 days after secondary immunization with TNP-KLH, by using plates that had been precoated with TNP(11)-BSA and with TNP(2)-BSA, respectively. Anti-single-stranded DNA (anti-ssDNA) antibodies were measured by ELISA using plates precoated with ssDNA. Anti-chromatin antibodies were measured by ELISA using plates that had been coated with double-stranded DNA and total histone solution (Sigma Chemical). Standard units were derived using serial dilution of an anti-nuclear antibody (ANA)-positive NZM2410 serum pool.

1. Lim A, et al. (2002) Combination of MHC-peptide multimer-based T cell sorting with the immunoscope permits sensitive ex vivo quantitation and follow-up of human CD8<sup>+</sup> T cell immune responses. *J Immunol Methods* 261:177-194.

A

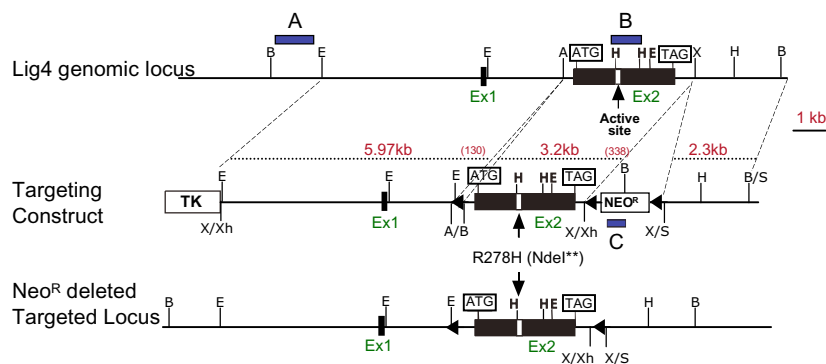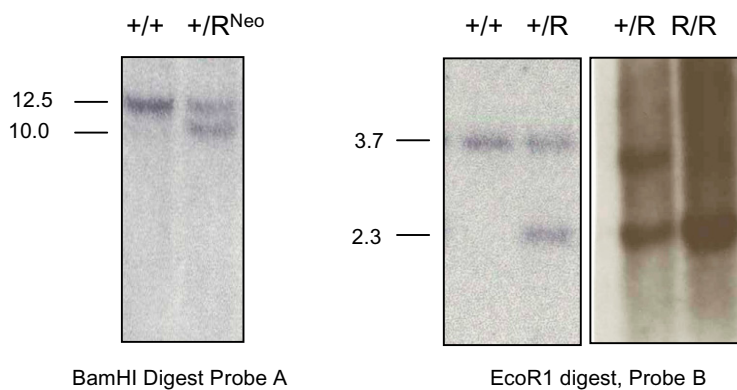

B

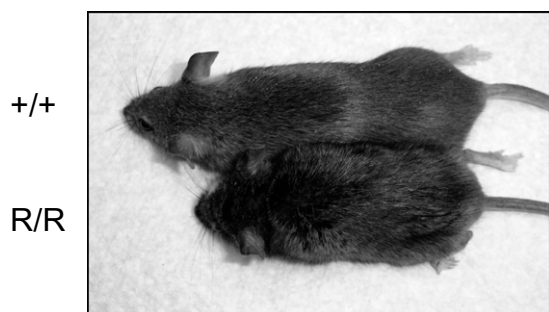

C

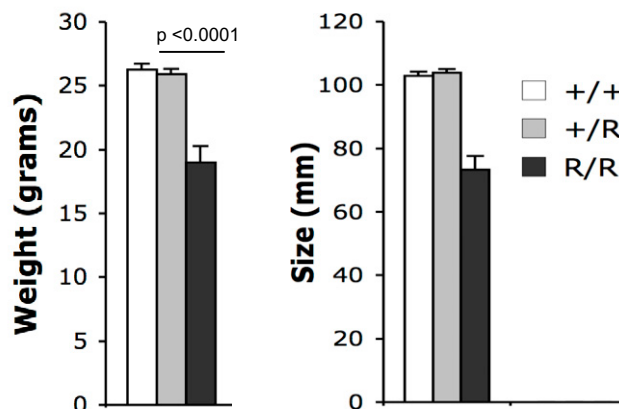

**Fig. S1.** Targeting strategy at the *Lig4* locus. (A) (Upper) Schematic of targeting construct and Southern blot analysis of sequentially targeted ES clones. Top, organization of the *Lig4* genomic locus and probes used. Middle, targeting construct with CGC to CAT nucleotide change at codon 278, leading to arginine (R) 278 to histidine (H) mutation in the catalytic active site of the protein. A novel NdeI<sup>\*\*</sup> restriction site created by the R278H mutation is shown. The final R278H targeting construct consists of two *Lig4* gene genomic fragments: a 9.17-kb XbaI 5' arm containing both *Lig4* gene exons 1 and 2 blunted by a Klenow fragment and cloned into the XhoI site of the pLNTK targeting vector and a 2.3-kb XbaI-BamHI fragment (3' arm) that was blunted by a Klenow fragment and cloned into the Sall site of pLNTK. We generated the R278H targeting construct such that the *Lig4* gene could if needed also be conditionally inactivated by Cre recombinase by flanking *Lig4* exon 2 with loxP sites. The 5' loxP, which is contained within a 100-bp BamHI fragment with a unique EcoRI site, was blunt-end ligated into the AflII site 130 bp upstream of the exon 2 ATG. The 3' loxP site, which flanks the neomycin resistance (Neo<sup>R</sup>) gene in pLNTK, resides 338 bp downstream of the *Lig4* gene TAG stop codon. The distances between the loxP sites that flank *Lig4* exon 2 and the ATG translation initiation site and the TAG

Legend continued on following page

stop codon are shown in parentheses. *Bottom*, targeted locus with Neo<sup>R</sup> marker deleted. A, AflIII; B, BamHI; E, EcoRI; H, HindIII; S, SacI; X, XbaI; Xh, XhoI. —, 1-kb bar. (Lower) Southern blot of BamHI (left) or EcoRI (right)-digested ES cell genomic DNA, probed with probes A and B, respectively, was used to detect wild-type (+/+), heterozygous (+/R), and homozygous (R/R) bands. For sequential targeting in ES cells, probe C (shown in A) was used to identify +/R<sup>Neo</sup> and R/R<sup>Neo</sup> ES cells that were then infected with the Cre-recombinase to obtain +/R and R/R ES cells, respectively. Southern blotting using EcoRI (right)-digested ES cell genomic DNA was then probed with probe B to detect the germline 3.7-kb and the mutant (R) 2.3-kb bands and with probe C to detect loss of the Neo<sup>R</sup> gene. (B) +/+ and R/R littermates are compared side by side at 4 months of age. R/R mice display significant growth retardation compared with +/+ and +/R littermates. (C) Weight and size (mean ± SE) of 20-week-old +/+ (n = 10), +/R (n = 10), and R/R (n = 10) littermates. P values were determined by unpaired Student's t test.

**A**

|      | Cell line           | (Amp <sup>R</sup> +Cam <sup>R</sup> )/Amp <sup>R</sup> | Percentage | Relative level |
|------|---------------------|--------------------------------------------------------|------------|----------------|
| Exp1 | TC1                 | 244/206,600                                            | 0.1181     |                |
|      | Lig4 <sup>R/R</sup> | 9/313,000                                              | 0.00288    | 0.0246         |
|      | Lig4 <sup>-/-</sup> | 18/376,200                                             | 0.00478    | 0.04053        |
| Exp2 | TC1                 | 1,300/364,000                                          | 0.3571     |                |
|      | Lig4 <sup>R/R</sup> | 8/203,000                                              | 0.00394    | 0.0109         |
|      | Lig4 <sup>-/-</sup> | 4/440,000                                              | 0.00091    | 0.00254        |
| Exp3 | TC1                 | 402/213,400                                            | 0.1883     |                |
|      | Lig4 <sup>R/R</sup> | 3/81,000                                               | 0.003703   | 0.0196         |
|      | Lig4 <sup>-/-</sup> | 3/103,700                                              | 0.00289    | 0.01535        |

**B**

**RS Joins recovered from Lig4<sup>R/R</sup> ES cells**

|     | Left RS Flank              | N               | Right RS Flank                           | # Clones |
|-----|----------------------------|-----------------|------------------------------------------|----------|
|     | GTTTTTGTCCAGTCTGTAGCACTGTG |                 | CACAGTGGTAGTACCTCCACTGTCTGGCTGTACAAAAACC |          |
| 0   | GTTTTTGTCCAGTCTGTAGCACTGTG |                 | CACAGTGGTAGTACCTCCACTGTCTGGCTGTACAAAAACC | 0 14     |
| 0   | GTTTTTGTCCAGTCTGTAGCACTGTG |                 | CACAGTGGTAGTACCTCCACTGTCTGGCTGTACAAAAACC | -40 1    |
| 0   | GTTTTTGTCCAGTCTGTAGCACTGTG | GTAGTA          | CTCCACTGTCTGGCTGTACAAAAACC               | -14 1    |
| -7  | GTTTTTGTCCAGTCTGTAG        | TA              | CTCCACTGTCTGGCTGTACAAAAACC               | -14 1    |
| -16 | GTTTTTGTCC                 |                 | CTCCACTGTCTGGCTGTACAAAAACC               | -14 1    |
| -16 | GTTTTTGTCC                 |                 | CTCCACTGTCTGGCTGTACAAAAACC               | -40 1    |
| -27 | GTTTTTGTCC                 |                 | CTCCACTGTCTGGCTGTACAAAAACC               | -14 1    |
| -15 | GTTTTTGTCCA                | 248bp insertion | AAAAACC                                  | -33 1    |

**RS Joins recovered from TC1 ES cells**

|   | Left RS Flank              | N | Right RS Flank                           | # Clones |
|---|----------------------------|---|------------------------------------------|----------|
|   | GTTTTTGTCCAGTCTGTAGCACTGTG |   | CACAGTGGTAGTACCTCCACTGTCTGGCTGTACAAAAACC |          |
| 0 | GTTTTTGTCCAGTCTGTAGCACTGTG |   | CACAGTGGTAGTACCTCCACTGTCTGGCTGTACAAAAACC | 0 27     |

**Fig. S2.** Analysis of RS joins in Lig4<sup>R/R</sup> ES cells. (A) Analysis of RS joins from three independent experiments. (B) Sequence analysis of V(D)J RS joins (pJH200) recovered from Lig4<sup>R/R</sup> and wild-type TC1 ES cells in V(D)J recombination assays. The fidelity of the RS joins was determined by PCR amplification of the pJH200 segment and digestion of the products with ApaLI. Individual Amp<sup>R</sup>+Cam<sup>R</sup> clones were isolated and sequenced. Germline sequences are shown in the first row. Nucleotides that cannot be unequivocally assigned to either flanking end are shown in the center. The number in the right column (# clones) indicates the number of identical sequences recovered from the various transfection experiments.

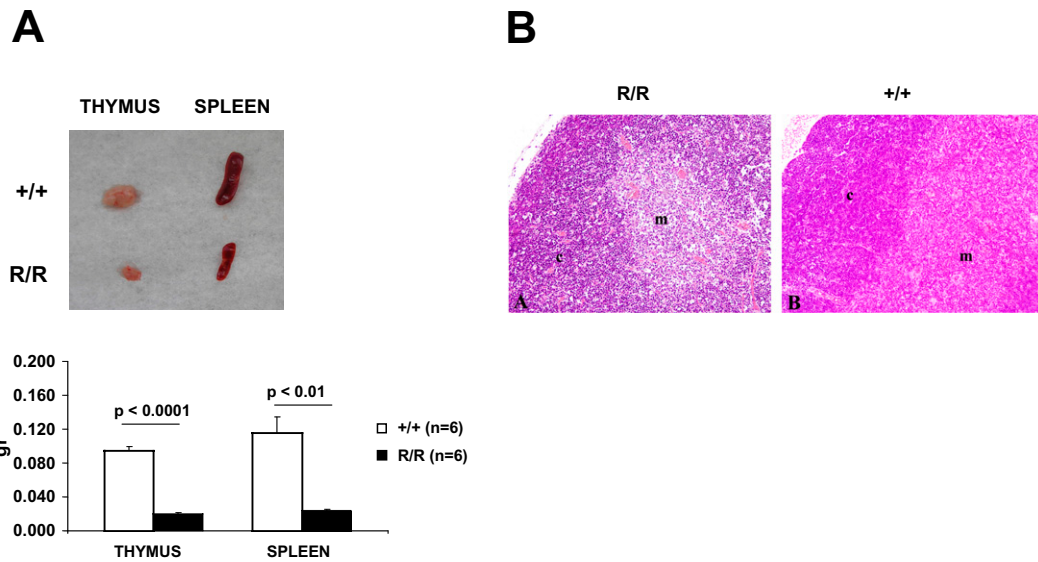

**Fig. S3.** *Lig4<sup>R/R</sup>* mice have hypoplastic thymus and spleen and show mild thymic alterations with conserved architecture and corticomedullary differentiation. (A) (Upper) Comparison of thymus and spleen of wild-type (+/+) versus *Lig4<sup>R/R</sup>* (R/R) mice. (Lower) Weight of thymus and spleen in +/+ and R/R mice. Weight in grams (gr) is shown as mean  $\pm$  SE. (B) Hematoxylin/eosin staining of thymic sections from of a representative R/R mouse (A) shows mild architectural abnormalities with conserved demarcation between the cortex (c) and the small-sized medulla (m). Architecture of the thymus from a littermate control is shown for comparison (B). (Magnification, 10 $\times$ .)

|                               | Vbeta 14 coding sequence      | P/N                           | Dbeta 1 segment                         | P/N                                     | Jbeta1.1 sequence               | FRAME                         | No. of deleted nts |   |
|-------------------------------|-------------------------------|-------------------------------|-----------------------------------------|-----------------------------------------|---------------------------------|-------------------------------|--------------------|---|
| <b>Coding joins</b>           | CTCTGGCTTCTACCTCTGTGCTGGAGTCT |                               | GGGACAGGGGC                             |                                         | CAAAACACAGAAGTCTCTTTGGTAAAGGAAC |                               |                    |   |
|                               | CTCTGGCTTCTACCTCTGTGCTGGAGTCT | CCA                           | GGGAC                                   | GGA                                     | ACAGAAGTCTCTTTGGTAAAGGAAC       | NP                            | 4                  |   |
|                               | CTCTGGCTTCTACCTCTGTGCTGGAGTCT | CA                            | GGACAG                                  | A                                       | AAACACAGAAGTCTCTTTGGTAAAGGAAC   | P                             | 1                  |   |
|                               | CTCTGGCTTCTACCTCTGTGCTGGAGTCT | AT                            | CAGGGG                                  | GCTGT                                   | ACACAGAAGTCTCTTTGGTAAAGGAAC     | NP                            | 3                  |   |
|                               | CTCTGGCTTCTACCTCTGTGCTGGAGTCT | CCT                           | C                                       | G                                       | CAACACAGAAGTCTCTTTGGTAAAGGAAC   | P                             | 0                  |   |
|                               | CTCTGGCTTCTACCTCTGTGCTGGAGTCT | TTAAA                         | GGGC                                    | C                                       | CAACACAGAAGTCTCTTTGGTAAAGGAAC   | NP                            | 0                  |   |
|                               | CTCTGGCTTCTACCTCTGTGCTGGAGTCT | CCACGG                        | AGGGG                                   |                                         | ACACAGAAGTCTCTTTGGTAAAGGAAC     | P                             | 3                  |   |
|                               | CTCTGGCTTCTACCTCTGTGCTGGAGTCT | A                             | AGGGG                                   | TGGC                                    | ACACAGAAGTCTCTTTGGTAAAGGAAC     | NP                            | 3                  |   |
|                               | CTCTGGCTTCTACCTCTGTGCTGGAGTCT | TTAA                          | AGGG                                    | CC                                      | CAAAACACAGAAGTCTCTTTGGTAAAGGAAC | NP                            | 0                  |   |
|                               | CTCTGGCTTCTACCTCTGTGCTGGAGTCT | CCCC                          | GGGAC                                   |                                         | CAAAACACAGAAGTCTCTTTGGTAAAGGAAC | P                             | 1                  |   |
|                               | CTCTGGCTTCTACCTCTGTGCTGGAGTCT | CACGTATC                      | GGA                                     | GA                                      | AAACACAGAAGTCTCTTTGGTAAAGGAAC   | NP                            | 4                  |   |
|                               | CTCTGGCTTCTACCTCTGTGCTGGAGTCT | CGGT                          | ACAGG                                   |                                         | GAAGTCTCTTTGGTAAAGGAAC          | P                             | 11                 |   |
|                               | CTCTGGCTTCTACCTCTGTGCTGGAGTCT | GCA                           | ACAG                                    | AA                                      | CAAAACACAGAAGTCTCTTTGGTAAAGGAAC | NP                            | 3                  |   |
|                               | CTCTGGCTTCTACCTCTGTGCTGGAGTCT | CCG                           | CAGGGG                                  |                                         | AAACACAGAAGTCTCTTTGGTAAAGGAAC   | P                             | 4                  |   |
|                               | CTCTGGCTTCTACCTCTGTGCTGGAGTCT |                               | AGG                                     | TG                                      | CAAAACACAGAAGTCTCTTTGGTAAAGGAAC | P                             | 3                  |   |
|                               | CTCTGGCTTCTACCTCTGTGCTGGAGTCT | GA                            | GGGAC                                   |                                         | CAAAACACAGAAGTCTCTTTGGTAAAGGAAC | P                             | 5                  |   |
|                               | <b>+/+</b>                    | CTCTGGCTTCTACCTCTGTGCTGGAGTCT | G                                       | GGGGC                                   | AC                              | ACACAGAAGTCTCTTTGGTAAAGGAAC   | P                  | 3 |
|                               |                               | CTCTGGCTTCTACCTCTGTGCTGGAGTCT |                                         | GGACAGG                                 |                                 | GAAGTCTCTTTGGTAAAGGAAC        | P                  | 8 |
|                               |                               | CTCTGGCTTCTACCTCTGTGCTGGAGTCT |                                         | AGG                                     | C                               | AAACACAGAAGTCTCTTTGGTAAAGGAAC | P                  | 2 |
|                               |                               | CTCTGGCTTCTACCTCTGTGCTGGAGTCT |                                         | AGGG                                    |                                 | ACAGAAGTCTCTTTGGTAAAGGAAC     | P                  | 5 |
| CTCTGGCTTCTACCTCTGTGCTGGAGTCT |                               | GGGAGC                        | CAGGG                                   |                                         | GAAGTCTCTTTGGTAAAGGAAC          | P                             | 9                  |   |
| CTCTGGCTTCTACCTCTGTGCTGGAGTCT |                               |                               | CA                                      | AC                                      | CACAGAAGTCTCTTTGGTAAAGGAAC      | P                             | 5                  |   |
| CTCTGGCTTCTACCTCTGTGCTGGAGTCT |                               | GGG                           | AGGGG                                   | GCCGG                                   | AAACACAGAAGTCTCTTTGGTAAAGGAAC   | P                             | 5                  |   |
| CTCTGGCTTCTACCTCTGTGCTGGAGTCT |                               |                               | GA                                      | A                                       | AAACACAGAAGTCTCTTTGGTAAAGGAAC   | P                             | 7                  |   |
| CTCTGGCTTCTACCTCTGTGCTGGAGTCT |                               |                               | GGA                                     |                                         | AGAAGTCTCTTTGGTAAAGGAAC         | P                             | 10                 |   |
| CTCTGGCTTCTACCTCTGTGCTGGAGTCT |                               | CCTACA                        | AG                                      |                                         | CAAAACACAGAAGTCTCTTTGGTAAAGGAAC | P                             | 4                  |   |
| CTCTGGCTTCTACCTCTGTGCTGGAGTCT |                               |                               | CA                                      |                                         | CAAAACACAGAAGTCTCTTTGGTAAAGGAAC | P                             | 4                  |   |
| CTCTGGCTTCTACCTCTGTGCTGGAGTCT |                               |                               | CA                                      |                                         | CAGAAGTCTCTTTGGTAAAGGAAC        | P                             | 10                 |   |
| CTCTGGCTTCTACCTCTGTGCTGGAGTCT |                               | T                             | GGA                                     | A                                       | AAACACAGAAGTCTCTTTGGTAAAGGAAC   | P                             | 6                  |   |
| CTCTGGCTTCTACCTCTGTGCTGGAGTCT |                               | GGG                           | GGGG                                    | GTT                                     | CAAAACACAGAAGTCTCTTTGGTAAAGGAAC | P                             | 5                  |   |
| CTCTGGCTTCTACCTCTGTGCTGGAGTCT |                               |                               | C                                       |                                         | AAGTCTCTTTGGTAAAGGAAC           | P                             | 14                 |   |
| CTCTGGCTTCTACCTCTGTGCTGGAGTCT |                               | GGTG                          | CAGGGG                                  | G                                       | CAAAACACAGAAGTCTCTTTGGTAAAGGAAC | NP                            | 16                 |   |
| <b>R/R</b>                    |                               | CTCTGGCTTCTACCTCTGTGCTGGAGTCT |                                         | GGGGC                                   | AC                              | ACACAGAAGTCTCTTTGGTAAAGGAAC   | P                  | 3 |
|                               |                               | CTCTGGCTTCTACCTCTGTGCTGGAGTCT |                                         | GGACAGG                                 |                                 | GAAGTCTCTTTGGTAAAGGAAC        | P                  | 8 |
|                               |                               | CTCTGGCTTCTACCTCTGTGCTGGAGTCT |                                         | AGG                                     | C                               | AAACACAGAAGTCTCTTTGGTAAAGGAAC | P                  | 2 |
|                               |                               | CTCTGGCTTCTACCTCTGTGCTGGAGTCT |                                         | AGGG                                    |                                 | ACAGAAGTCTCTTTGGTAAAGGAAC     | P                  | 5 |
|                               | CTCTGGCTTCTACCTCTGTGCTGGAGTCT | GGGAGC                        | CAGGG                                   |                                         | GAAGTCTCTTTGGTAAAGGAAC          | P                             | 9                  |   |
|                               | CTCTGGCTTCTACCTCTGTGCTGGAGTCT |                               | CA                                      | AC                                      | CACAGAAGTCTCTTTGGTAAAGGAAC      | P                             | 5                  |   |
|                               | CTCTGGCTTCTACCTCTGTGCTGGAGTCT | GGG                           | AGGGG                                   | GCCGG                                   | AAACACAGAAGTCTCTTTGGTAAAGGAAC   | P                             | 5                  |   |
|                               | CTCTGGCTTCTACCTCTGTGCTGGAGTCT |                               | GA                                      | A                                       | AAACACAGAAGTCTCTTTGGTAAAGGAAC   | P                             | 7                  |   |
|                               | CTCTGGCTTCTACCTCTGTGCTGGAGTCT |                               | GGA                                     |                                         | AGAAGTCTCTTTGGTAAAGGAAC         | P                             | 10                 |   |
|                               | CTCTGGCTTCTACCTCTGTGCTGGAGTCT | CCTACA                        | AG                                      |                                         | CAAAACACAGAAGTCTCTTTGGTAAAGGAAC | P                             | 4                  |   |
|                               | CTCTGGCTTCTACCTCTGTGCTGGAGTCT |                               | CA                                      |                                         | CAAAACACAGAAGTCTCTTTGGTAAAGGAAC | P                             | 4                  |   |
|                               | CTCTGGCTTCTACCTCTGTGCTGGAGTCT |                               | CA                                      |                                         | CAGAAGTCTCTTTGGTAAAGGAAC        | P                             | 10                 |   |
|                               | CTCTGGCTTCTACCTCTGTGCTGGAGTCT | T                             | GGA                                     | A                                       | AAACACAGAAGTCTCTTTGGTAAAGGAAC   | P                             | 6                  |   |
|                               | CTCTGGCTTCTACCTCTGTGCTGGAGTCT | GGG                           | GGGG                                    | GTT                                     | CAAAACACAGAAGTCTCTTTGGTAAAGGAAC | P                             | 5                  |   |
|                               | CTCTGGCTTCTACCTCTGTGCTGGAGTCT |                               | C                                       |                                         | AAGTCTCTTTGGTAAAGGAAC           | P                             | 14                 |   |
|                               | CTCTGGCTTCTACCTCTGTGCTGGAGTCT | GGTG                          | CAGGGG                                  | G                                       | CAAAACACAGAAGTCTCTTTGGTAAAGGAAC | NP                            | 16                 |   |
|                               | <b>RS joins</b>               | CTTTTTGTATAAAGCTGTAACATTGTG   |                                         | CACACTGAGTAGGGTGGGGCAGACATCTGTGCAAAAAAC |                                 |                               |                    |   |
|                               |                               | CTTTTTGTATAAAGCTGTAACATTGTG   |                                         | CACACTGAGTAGGGTGGGGCAGACATCTGTGCAAAAAAC | 23                              | 0                             | 0                  |   |
|                               |                               | CTTTTTGTATAAAGCTGTAACATTGTG   | GG                                      | CACACTGAGTAGGGTGGGGCAGACATCTGTGCAAAAAAC | 2                               | 0                             | 2                  |   |
|                               |                               | CTTTTTGTATAAAGCTGTAACATTGTG   | CC                                      | CACACTGAGTAGGGTGGGGCAGACATCTGTGCAAAAAAC | 2                               | 0                             | 2                  |   |
| CTTTTTGTATAAAGCTGTAACATTGTG   |                               | GT                            | CACACTGAGTAGGGTGGGGCAGACATCTGTGCAAAAAAC | 1                                       | 0                               | 2                             |                    |   |
| CTTTTTGTATAAAGCTGTAACATTGTG   |                               | ACG                           | CACACTGAGTAGGGTGGGGCAGACATCTGTGCAAAAAAC | 1                                       | 0                               | 3                             |                    |   |
| CTTTTTGTATAAAGCTGTAACATTGTG   |                               | GGG                           | CACACTGAGTAGGGTGGGGCAGACATCTGTGCAAAAAAC | 1                                       | 0                               | 3                             |                    |   |
| CTTTTTGTATAAAGCTGTAACATTGTG   |                               | GGGGT                         | CACACTGAGTAGGGTGGGGCAGACATCTGTGCAAAAAAC | 1                                       | 0                               | 5                             |                    |   |
| <b>+/+</b>                    |                               | CTTTTTGTATAAAGCTGTAACATTGTG   |                                         | CTGAGTAGGGTGGGGCAGACATCTGTGCAAAAAAC     | 1                               | 4                             | 0                  |   |
|                               |                               | CTTTTTGTATAAAGCTGTAACATTGTG   | CC                                      | CTGAGTAGGGTGGGGCAGACATCTGTGCAAAAAAC     | 1                               | 5                             | 2                  |   |
|                               |                               | CTTTTTGTATAAAGCTGTAACATTGTG   |                                         | GGTGGGGCAGACATCTGTGCAAAAAAC             | 2                               | 13                            | 0                  |   |
|                               |                               | CTTTTTGTATAAAGCTGTAACATTGTG   |                                         | GGGGCAGACATCTGTGCAAAAAAC                | 3                               | 22                            | 0                  |   |
|                               |                               | CTTTTTGTATAAAGCTGTAACATTGTG   |                                         | AACC                                    | 2                               | 44                            | 0                  |   |
|                               |                               | CTTTTTGTATAAAGCTGT            | CGG                                     | GTAGGGTGGGGCAGACATCTGTGCAAAAAAC         | 2                               | 17                            | 3                  |   |
|                               |                               | CTTTTTGTATAAAGCTGT            | CC                                      | CACACTGAGTAGGGTGGGGCAGACATCTGTGCAAAAAAC | 1                               | 9                             | 2                  |   |
|                               |                               | CTTTTTGTATAAAGCTGT            | GGCATTGGG                               | AGACATCTGTGCAAAAAAC                     | 1                               | 29                            | 9                  |   |
|                               |                               | CTTT                          |                                         | GGTGGGGCAGACATCTGTGCAAAAAAC             | 1                               | 35                            | 0                  |   |
|                               |                               | CTT                           | C                                       | GGTGGGGCAGACATCTGTGCAAAAAAC             | 1                               | 36                            | 1                  |   |
| <b>R/R</b>                    |                               | (-35bp from the CTTT)         |                                         | (-65bp from the CACA)                   | 1                               | 166                           | 0                  |   |
|                               |                               | (-12bp from the CTTT)         |                                         | (-41bp from the CACA)                   | 1                               | 119                           | 0                  |   |
|                               | CTTTTTGTATAAAGCTGTAACATTGTG   |                               | CTGAGTAGGGTGGGGCAGACATCTGTGCAAAAAAC     | 1                                       | 4                               | 0                             |                    |   |
|                               | CTTTTTGTATAAAGCTGTAACATTGTG   | CC                            | CTGAGTAGGGTGGGGCAGACATCTGTGCAAAAAAC     | 1                                       | 5                               | 2                             |                    |   |
|                               | CTTTTTGTATAAAGCTGTAACATTGTG   |                               | GGTGGGGCAGACATCTGTGCAAAAAAC             | 2                                       | 13                              | 0                             |                    |   |
|                               | CTTTTTGTATAAAGCTGTAACATTGTG   |                               | GGGGCAGACATCTGTGCAAAAAAC                | 3                                       | 22                              | 0                             |                    |   |
|                               | CTTTTTGTATAAAGCTGT            | CGG                           | GTAGGGTGGGGCAGACATCTGTGCAAAAAAC         | 2                                       | 17                              | 3                             |                    |   |
|                               | CTTTTTGTATAAAGCTGT            | CC                            | CACACTGAGTAGGGTGGGGCAGACATCTGTGCAAAAAAC | 1                                       | 9                               | 2                             |                    |   |
|                               | CTTTTTGTATAAAGCTGT            | GGCATTGGG                     | AGACATCTGTGCAAAAAAC                     | 1                                       | 29                              | 9                             |                    |   |
|                               | CTTT                          |                               | GGTGGGGCAGACATCTGTGCAAAAAAC             | 1                                       | 35                              | 0                             |                    |   |

**Fig. S4.** *Lig4<sup>R/R</sup>* thymocytes show largely preserved coding joins formation, but imprecise RS joins. (Upper) Comparison of Vβ14-Dβ1-Jβ1.1 rearrangements in thymocytes from *Lig4<sup>+/+</sup>* (+/+) and *Lig4<sup>R/R</sup>* (R/R) mice. The germline sequence of the Vβ14, Dβ1, and Jβ1.1 segments is shown at the top. Individual clones with productive (P) and nonproductive (NP) rearrangements are shown, with P/N nucleotide insertions. The number of deleted nucleotides is shown in the right column. Boxes identify areas of microhomology. (Lower) RS joins sequences in thymocytes from +/+ and R/R mice, following Vβ14-Dβ1 rearrangement. The number of individual clones showing each sequence is shown. RS joins in R/R mice are characterized by extensive deletions.
